# Supplementary material for: The role of elective surgical hubs within the National Health Service in England: an online qualitative survey of staff
Source: Research Square preprint supplement (doi:10.21203/rs.3.rs-7099015/v1), 2025-09-11
Supplement: Supplementary file 2 [file 869bb1ff43cb04c409a61134.docx]

[CLOSED] HUBS T1 [skin 2.2.6] - production

Start of Block: Eligibility - role

What is an elective surgical hub? Elective surgical hubs are dedicated hospital sites which carry out only planned operations as well as related outpatient appointments. They are operated by an NHS trust and can either be part of a bigger hospital or located in a separate building.

Please select the option that best describes you:

- I currently work, or have worked in the last three years, in an elective surgical hub
- I do not work on a day-to-day basis in an elective surgical hub, but have a leadership or management role that includes a responsibility for an elective surgical hub
- I do not work in an elective surgical hub, or have a leadership or management role with responsibility for an elective surgical hub, but am currently working in a surgical team or management role in the wider organisation or local healthcare system
- I am none of the above

End of Block: Eligibility - role

Start of Block: Consent

| 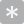 |
| --- |

To take part please read the following statement and, if you agree, select 'Yes'

- I understand what taking part in this project involves and agree to take part.

End of Block: Consent

Start of Block: None of the above Q

Display This Question:

If Please select the option that best describes you: = I am none of the above

Do you have any thoughts about elective surgical hubs that you would like to share?

________________________________________________________________

________________________________________________________________

________________________________________________________________

________________________________________________________________

________________________________________________________________

End of Block: None of the above Q

Start of Block: Introduction

**Thanks so much for joining us** as we explore how elective surgical hubs are working across England. On the following pages, we will first ask you some brief questions about your role. We will then ask you about how you think your elective surgical hub is (or more generally elective surgical hubs are) working across key areas of interest, including staffing and working practices. For some of these questions, we will ask you to type out your reflections - your views are really important, so please do feel free to tell us as much as you can for each area. We estimate the questions will take around  **20-25 minutes** to complete. It would be great if you could complete these all in one go, but you can save your answers and return to them another time if you prefer. Please feel free to skip any questions you do not wish to answer. When you are ready to start, please select the 'Next' button.

End of Block: Introduction

Start of Block: About your role

About your role

To begin, we would like to ask you a few brief questions to help us understand more about you. This information will help us to know if we are hearing from the full range of elective surgical hub sites, and from everyone involved with elective surgical hubs. **It will not be used in any way to check on specific elective surgical hub performance.**

What is your primary role? If needed, you can select more than one option to best reflect the roles you have.

- Clinical (for example, anyone working as a doctor, nurse or in any other patient care role)
- Non-clinical (for example, anyone working in management or administrative roles)
- Other

| Page Break |  |
| --- | --- |

Display This Question:

If What is your primary role? If needed, you can select more than one option to best reflect the rol... = Clinical (for example, anyone working as a doctor, nurse or in any other patient care role)

What is your primary clinical role?

- Registered nurse
- Trainee or student nurse
- Nursing or health care assistant
- Consultant surgeon
- Trainee surgeon
- Consultant anaesthetist
- Trainee anaesthetist
- Other junior doctor (e.g., core or other specialty trainees)
- Allied health professional (e.g., pharmacist, physiotherapist)
- Other clinical role (please describe) __________________________________________________

Display This Question:

If What is your primary role? If needed, you can select more than one option to best reflect the rol... = Non-clinical (for example, anyone working in management or administrative roles)

What is your primary non-clinical role?

- Commissioning manager / support staff
- Administrative / clerical
- General management
- Central functions / corporate services (e.g., HR / IT)
- Maintenance / ancillary (e.g., facilities / estates / housekeeping)
- Improvement or Transformation Manager
- Other non-clinical role (please describe) __________________________________________________

| Page Break |  |
| --- | --- |

Where are you currently employed? To let us know, please select your region, Trust and then the relevant elective surgical hub from the drop down lists below. If you work across multiple trusts or elective surgical hubs, either choose one main site that you will refer to in your responses, or select "Other" and use the free-text box to provide further details. If you work at a specific trust but not in an elective surgical hub, please simply select "N/A" for the elective surgical hub choice.

Region (list of England regions below, plus Other, Prefer not to say, I don’t know):

- North East and Yorkshire
- North West
- South East
- London
- East of England
- Midlands
- South West
- England-wide

Trust (list of NHS Trusts filtered by selected England region, plus Other, Prefer not to say, I don’t know)

Elective Surgical Hub (list of Elective Surgical Hubs filtered by selected Trust, plus Other, Prefer not to say, I don’t know)

Please provide below any further details about the trust(s) or elective surgical hub(s) that you work with. For example, if you work at multiple locations or you were unable to find the name of your trust/elective surgical hub in the drop-down above, please provide details here.

________________________________________________________________

________________________________________________________________

________________________________________________________________

________________________________________________________________

________________________________________________________________

If there is anything else you feel it would be helpful to know about **your role in relation to elective surgical hubs,** or which would help to put your answers in context, please do tell us here.

________________________________________________________________

________________________________________________________________

________________________________________________________________

________________________________________________________________

________________________________________________________________

End of Block: About your role

Start of Block: Benefits

Benefits We would like to start by asking for your views on the potential benefits of the elective surgical hub model. Please read the brief background material below, then answer the questions that follow.

Benefits of elective surgical hubs
Elective surgical hubs are hoped to lead to five key benefits to NHS patients and staff: More **efficient** use of surgical capacity and increased throughput Increased **resilience** against winter pressures​ Streamlined pathways, allowing more day case procedures to be carried out and **shorter length of stay** Application of innovative, **more sustainable workforce models** **Improved work environment and experience for staff**, resulting in improved morale, recruitment and retention Overall, these benefits should result in improved patient experience.

How much do you agree or disagree with the following statement? I believe elective surgical hubs bring benefits to NHS patients and staff.

- 1: Strongly disagree
- 2: Disagree
- 3: Neither agree or disagree
- 4: Agree
- 5: Strongly agree
- 0: I don't know

| Page Break |  |
| --- | --- |

In terms of specific benefits, how much do you agree or disagree with the following 5 statements?

1Elective surgical hubs enable more efficient use of surgical capacity and better patient flow

- 1: Strongly disagree
- 2: Disagree
- 3: Neither agree or disagree
- 4: Agree
- 5: Strongly agree
- 0: I don't know

2Elective surgical hubs enable increased resilience against winter pressures​

- 1: Strongly disagree
- 2: Disagree
- 3: Neither agree or disagree
- 4: Agree
- 5: Strongly agree
- 0: I don't know

3Elective surgical hubs enable streamlined pathways, more day case procedures to be carried out and shorter length of stay

- 1: Strongly disagree
- 2: Disagree
- 3: Neither agree or disagree
- 4: Agree
- 5: Strongly agree
- 0: I don't know

4Elective surgical hubs enable the application of an innovative, more sustainable workforce models

- 1: Strongly disagree
- 2: Disagree
- 3: Neither agree or disagree
- 4: Agree
- 5: Strongly agree
- 0: I don't know

5Elective surgical hubs enable improved work environment and experience for staff, resulting in improved morale, recruitment and retention

- 1: Strongly disagree
- 2: Disagree
- 3: Neither agree or disagree
- 4: Agree
- 5: Strongly agree
- 0: I don't know

If you would like to, please tell us a little more about the benefits of elective surgical hubs below.

________________________________________________________________

________________________________________________________________

________________________________________________________________

________________________________________________________________

________________________________________________________________

End of Block: Benefits

Start of Block: Content selection

Your experiences of elective surgical hubs

| 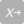 |
| --- |

We would like you to choose from the list below the aspects of elective surgical hubs you would like to comment on in this consultation. You can select all or just those topics you feel you would like to tell us about. For each you select, you will be asked to type some brief reflections on your experiences and views.

- Productivity
- Staffing
- Management and leadership
- Buildings, resources and finance
- Patient outcomes and experience
- ⊗All of the above
- ⊗None of the above

End of Block: Content selection

Start of Block: Productivity

Display This Question:

If We would like you to choose from the list below the aspects of elective surgical hubs you would l... = Productivity

Or We would like you to choose from the list below the aspects of elective surgical hubs you would l... = All of the above

Productivity **Please read** the brief background material below, then answer the question underneath.

Display This Question:

If We would like you to choose from the list below the aspects of elective surgical hubs you would l... = Productivity

Or We would like you to choose from the list below the aspects of elective surgical hubs you would l... = All of the above

Increasing productivity is a big focus in the set-up and day-to-day running of elective surgical hubs. This means ensuring the right structures, processes and resources are in place to ensure that the elective surgical hubs can achieve: Streamlined patient pathways, including efficient pre- and post-operative care Reduced length of stay Fewer short-notice cancellations and unused sessions Increased number of patient procedures per list Improved infection control

Display This Question:

If We would like you to choose from the list below the aspects of elective surgical hubs you would l... = Productivity

Or We would like you to choose from the list below the aspects of elective surgical hubs you would l... = All of the above

**Can you describe** what is helping to improve productivity, and what may not be helping to improve productivity, in the elective surgical hub you are involved in?

________________________________________________________________

________________________________________________________________

________________________________________________________________

________________________________________________________________

________________________________________________________________

End of Block: Productivity

Start of Block: Staffing

Display This Question:

If We would like you to choose from the list below the aspects of elective surgical hubs you would l... = Staffing

Or We would like you to choose from the list below the aspects of elective surgical hubs you would l... = All of the above

Staffing

Display This Question:

If We would like you to choose from the list below the aspects of elective surgical hubs you would l... = Staffing

Or We would like you to choose from the list below the aspects of elective surgical hubs you would l... = All of the above

Staffing is key to successful elective surgical hubs. GIRFT guidance on establishing an effective and resilient workforce for elective surgical hubs, published in 2022, highlights a range of recommendations to build an appropriately skilled sustainable hub workforce. It also outlines the staffing benefits which are associated with the elective surgical hub model, such as improved training opportunities, better work life balance and improved recruitment and retention. But we know there are real challenges in achieving this, including staff shortages, redeployments, a reliance on overtime work and not providing opportunities for staff learning or feedback.

Display This Question:

If We would like you to choose from the list below the aspects of elective surgical hubs you would l... = Staffing

Or We would like you to choose from the list below the aspects of elective surgical hubs you would l... = All of the above

**Drawing on your experience** what do you feel is working well, and what is working not so well, in the staffing of the elective surgical hub(s) you are involved in? What would make a positive difference?

________________________________________________________________

________________________________________________________________

________________________________________________________________

________________________________________________________________

________________________________________________________________

End of Block: Staffing

Start of Block: Management and leadership

Display This Question:

If We would like you to choose from the list below the aspects of elective surgical hubs you would l... = Management and leadership

Or We would like you to choose from the list below the aspects of elective surgical hubs you would l... = All of the above

Management and leadership

Display This Question:

If We would like you to choose from the list below the aspects of elective surgical hubs you would l... = Management and leadership

Or We would like you to choose from the list below the aspects of elective surgical hubs you would l... = All of the above

While several elective surgical hubs have been operational for many years, a large number have been established across England more recently. Strong, effective leadership and senior buy-in is considered crucial to the success of these new initiatives. We would like to hear from you about how you see this working. For example, do you have any thoughts on: How elective surgical hub services and staff ring-fencing is maintained and protected - or not - during critical incidents or other service pressures How well the elective surgical hub is managed as a distinct unit within the wider hospital trust, or across the wider system How data are used by the elective surgical hub or at system level to monitor and continually improve services, reduce inequalities and improve patient outcomes Whether the performance of the elective surgical hubs is a key focus of the senior leadership within the trust or local system

Display This Question:

If We would like you to choose from the list below the aspects of elective surgical hubs you would l... = Management and leadership

Or We would like you to choose from the list below the aspects of elective surgical hubs you would l... = All of the above

**Whether you are working daily with patients in the elective surgical hub or in a senior managerial role,** we are keen to hear your reflections on this crucial area.

________________________________________________________________

________________________________________________________________

________________________________________________________________

________________________________________________________________

________________________________________________________________

End of Block: Management and leadership

Start of Block: Buildings, resources and finance

Display This Question:

If We would like you to choose from the list below the aspects of elective surgical hubs you would l... = Buildings, resources and finance

Or We would like you to choose from the list below the aspects of elective surgical hubs you would l... = All of the above

Buildings, resources and finances

Display This Question:

If We would like you to choose from the list below the aspects of elective surgical hubs you would l... = Buildings, resources and finance

Or We would like you to choose from the list below the aspects of elective surgical hubs you would l... = All of the above

Having the right environment is crucial to achieve high quality efficient care; structural elements, such as equipment design and supply, buildings and facilities, also play a key role in staff and patient experience. Elective surgical hubs vary widely in their design and set up, for example whether they are in physically separate hospitals or buildings or ring-fenced theatres within the same building. Many elective surgical hubs also provide services for patients from multiple hospital sites or trusts which can impact the infrastructure and processes of managing patient flows across multiple providers, and access to local as well as elective surgical hub services for patients.

Display This Question:

If We would like you to choose from the list below the aspects of elective surgical hubs you would l... = Buildings, resources and finance

Or We would like you to choose from the list below the aspects of elective surgical hubs you would l... = All of the above

We are interested in hearing from you at how such factors impact on the quality and efficiency of care, your day-to-work working life, and the availability and flow of crucial resources across the system. Please write your reflections below.

________________________________________________________________

________________________________________________________________

________________________________________________________________

________________________________________________________________

________________________________________________________________

End of Block: Buildings, resources and finance

Start of Block: Patient outcomes and experience

Display This Question:

If We would like you to choose from the list below the aspects of elective surgical hubs you would l... = Patient outcomes and experience

Or We would like you to choose from the list below the aspects of elective surgical hubs you would l... = All of the above

Patient outcomes and experience

Display This Question:

If We would like you to choose from the list below the aspects of elective surgical hubs you would l... = Patient outcomes and experience

Or We would like you to choose from the list below the aspects of elective surgical hubs you would l... = All of the above

We know that patients value the speed and quality of care received, which can result from more streamlined clinical pathways, allowing more day case procedures to be carried out and shorter length of stays. We also know that they can encounter challenges, for example around scheduling or travelling to the elective surgical hub.

Display This Question:

If We would like you to choose from the list below the aspects of elective surgical hubs you would l... = Patient outcomes and experience

Or We would like you to choose from the list below the aspects of elective surgical hubs you would l... = All of the above

We are interested in knowing your thoughts on any aspect of patient experience and outcomes. Please write your reflections below.

________________________________________________________________

________________________________________________________________

________________________________________________________________

________________________________________________________________

________________________________________________________________

End of Block: Patient outcomes and experience

Start of Block: Productivity targets

Productivity targets

**We are interested in your views on the following two targets:** GIRFT productivity standards and guidance state that elective surgical hubs should meet a target of 85% theatre utilisation as well as a standard set of cases completed per list (i.e. there should be 10 cataracts done per list, or 8 for a training list)

This hubs productivity target seems **achievable**

- 1:Strongly disagree
- 2:Disagree
- 3:Neither agree nor disagree
- 4:Agree
- 5:Strongly agree
- 0: I don't know

Please add why you think this is the case

________________________________________________________________

________________________________________________________________

________________________________________________________________

________________________________________________________________

________________________________________________________________

GIRFT productivity standards and guidance state that theatres should run for 48 weeks of the year, for 2.5 sessions a day on six days a week

This hubs productivity target seems **achievable**

- 1:Strongly disagree
- 2:Disagree
- 3:Neither agree nor disagree
- 4:Agree
- 5:Strongly agree
- 0: I don't know

Please add why you think this is the case

________________________________________________________________

________________________________________________________________

________________________________________________________________

________________________________________________________________

________________________________________________________________

End of Block: Productivity targets

Start of Block: Key priorities

Key priorities

We have asked for your views across a range of areas crucial to how elective surgical hubs may be working. We would now like you to tell us what your **key priorities would be for improvement for all hubs.** Please identify **up to five** areas in which you feel elective surgical hubs would benefit from new thinking or changes in approach, using **short words or phrases**. You do not need to fill all the boxes - even identifying one area of action would be helpful.

- Area 1 __________________________________________________
- Area 2 __________________________________________________
- Area 3 __________________________________________________
- Area 4 __________________________________________________
- Area 5 __________________________________________________

**If you would like to,** please tell us a little more about your suggestions in the box below.

________________________________________________________________

________________________________________________________________

________________________________________________________________

________________________________________________________________

________________________________________________________________

End of Block: Key priorities

Start of Block: Final reflection

In these final questions, we would like you to think about the primary elective surgical hub you work in or work with. How much do you agree or disagree with the following two statements? **Patient care and experiences** have **improved** since the elective surgical hub was established

- 1: Strongly disagree
- 2: Disagree
- 3: Neither agree or disagree
- 4: Agree
- 5: Strongly agree
- 0: I don't know

**Staff experiences** have **improved** since the elective surgical hub was established

- 1: Strongly disagree
- 2: Disagree
- 3: Neither agree or disagree
- 4: Agree
- 5: Strongly agree
- 0: I don't know

Please add any final comments below if you wish, otherwise select the 'Submit' button to finish the consultation and submit your responses.

________________________________________________________________

________________________________________________________________

________________________________________________________________

________________________________________________________________

________________________________________________________________

End of Block: Final reflection
